# Supplementary material for: A novel polymer composite from polyhexamethylene guanidine hydrochloride for high performance triboelectric nanogenerators (TENGs)
Source: Royal Society of Chemistry journal article supplement (doi:10.1039/d4ra07768g), 2025-01-01
Supplement: d4ra07768g1.pdf [file d4ra07768g1.pdf]

## SUPPORTING INFORMATION

### A novel polymer composite from polyhexamethylene guanidine hydrochloride for high performance triboelectric nanogenerators (TEGs)

Doan T. Tung<sup>a</sup>, Le T. T. Tam<sup>a,b</sup>, Nguyen T. T. Duong<sup>a,b</sup>, Hoang T. Dung<sup>a,b</sup>, Ngo T. Dung<sup>a</sup>, Nguyen A. Duc<sup>c</sup>, Phan N. Hong<sup>d</sup>, Nguyen T. Dung<sup>a</sup>, Phan N. Minh<sup>b\*</sup> and Le T. Lu<sup>a,b\*</sup>

<sup>a</sup>. Institute for Tropical Technology, Vietnam Academy of Science and Technology, 18 Hoang Quoc Viet, Hanoi, Vietnam

<sup>b</sup>. Graduate University of Science and Technology, Vietnam Academy of Science and Technology, 18 Hoang Quoc Viet, Hanoi, Vietnam

<sup>c</sup>. Department of Physics, Faculty of Basic-Fundamental Sciences, Viet Nam Maritime University, 484 Lach Tray Road, Le Chan, Hai Phong, Viet Nam

<sup>d</sup>. Center for high technology research and development, Vietnam Academy of Science and Technology, 18 Hoang Quoc Viet, Hanoi, Vietnam

\*Corresponding authors: pnminh@vast.vn; ltlu@itt.vast.vn

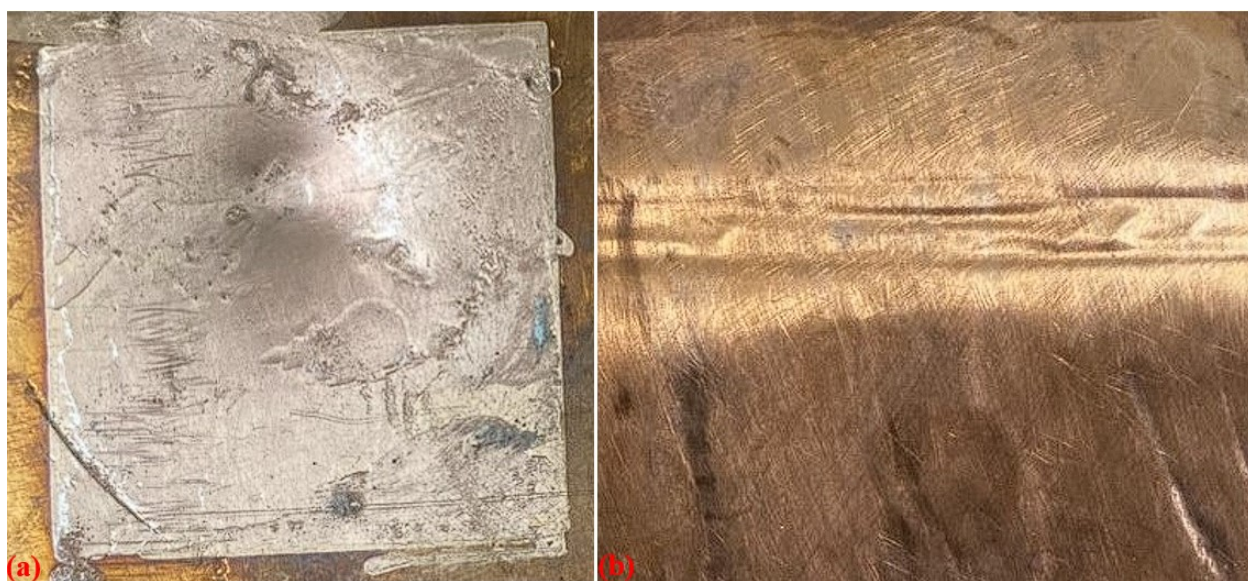

**Fig. S1.** PHMG8-GA-PVA1 film printed on copper foil after impact (a) and bending (b) strength test

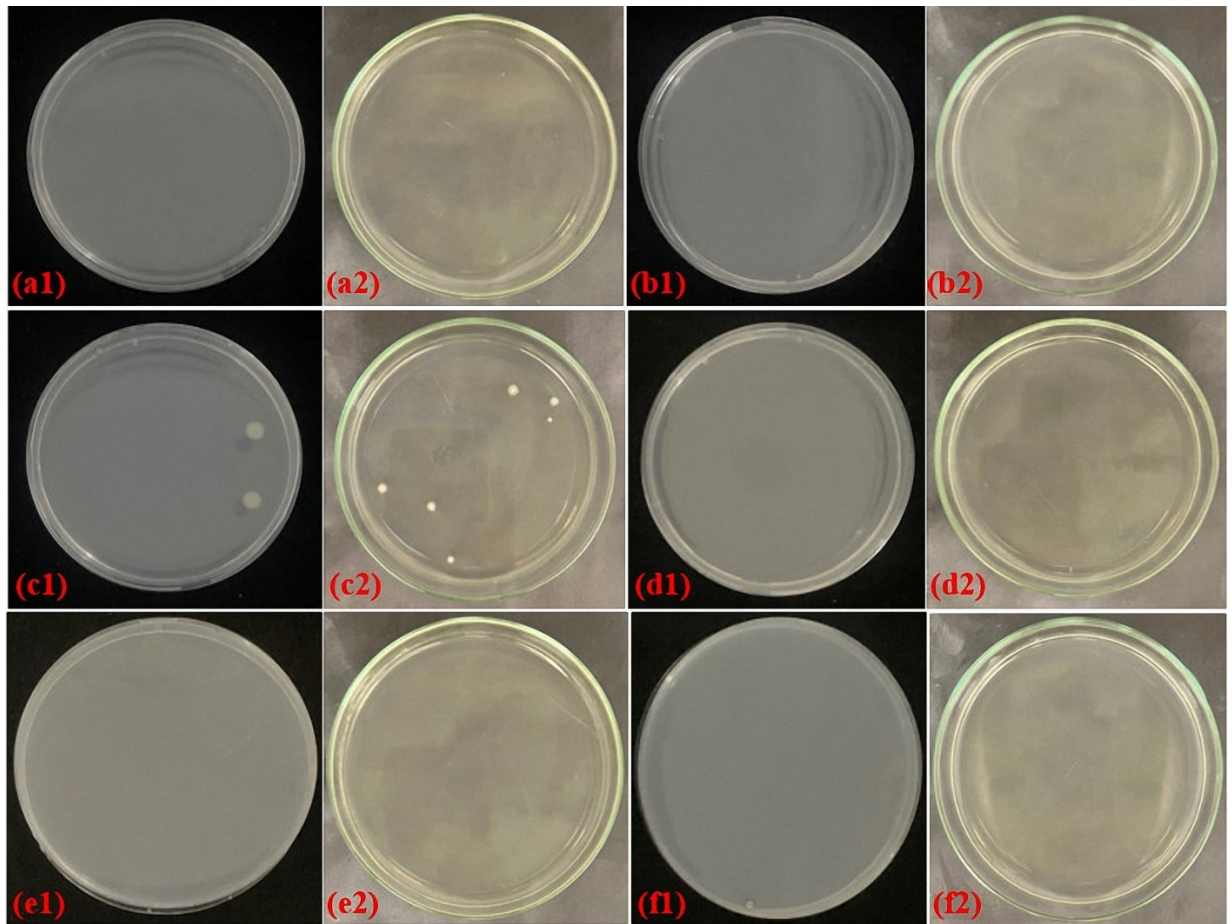

**Fig. S2.** Response of *S. subtilis* (1) and *E. coli* (2) bacteria of a) PHMG, b) PHMG-GA, c) PHMG soaked in water for 15 minutes, d) PHMG-GA soaked in water for 15 minutes, e) PHMG8-GA-PVA1, f) PHMG8-GA-PVA1 soaked in water for 15 minutes

**Table S1.** Comparison of some positive friction materials

| No. | Triboposive material        | Tribonegative material          | Applied force (N) | Applied frequency (Hz) | Maximum output voltage (V) | Ref. |
|-----|-----------------------------|---------------------------------|-------------------|------------------------|----------------------------|------|
| 1   | Cellulose nanofibrils (CNF) | FEP                             | -                 | 10                     | 32.8                       | [S1] |
| 2   | Chitosan                    | FEP                             | 8                 | 5                      | 150                        | [S2] |
| 3   | Al                          | FEP                             | 20                | -                      | 200                        | [S3] |
| 4   | TPU fiber (electrospinnig)  | FEP (without MoS <sub>2</sub> ) | -                 | ~ 4                    | 150                        | [S4] |
| 5   | Polyamide-66 (PA66)         | FEP                             | 10                | 2                      | 153                        | [S5] |
| 6   | PVA                         | PTFE                            | 50                | 5                      | 511                        | [S6] |

|   |               |     |    |      |       |           |
|---|---------------|-----|----|------|-------|-----------|
| 7 | PVA           | FEP | 10 | 3 Hz | 181   | This work |
| 8 | PHMG8-GA-PVA1 | FEP | 10 | 1 Hz | 467.4 | This work |

## Reference

- [S1] C. Yao, A. Hernandez, Y. Yu, Z. Cai and X. Wang, *Nano Energy*, 2016, **30**, 103-108.
- [S2] J.-N. Kim, J. Lee, T. W. Go, A. Rajabi-Abhari, M. Mahato, J. Yo. Park, H. Lee and I.-K. Oh, *Nano Energy*, 2020, **75**, 104904.
- [S3] S. Wang, Y. Xie, S. Niu, L. Lin, C. Liu, Y. S. Zhou, and Z. L. Wang, *Adv. Mater.*, 2014, **26**, 6720-6728.
- [S4] D. K. Tran, S. Veeralingam and J.-W. Kim, *Nano Energy*, 2024, **127**, 109714.
- [S5] J. Liu, P. Ji, Z. Wang, X. Liu, Y. Lin, X. Li, L. Chen, Xi. Tianb and S. Luo, *J. Mater. Chem. C*, 2023, **11**, 12222-12233.
- [S6] L. Shi, S. Dong, H. Xu, S. Huang, Q. Ye, S. Liu, T. Wu, J. Chen, S. Zhang, S. Li, X. Wang, H. Jin, J. M. Kim, J. Luo, *Nano Energy*, 2019, **64**, 103960.
